# Supplementary material for: Triglyceride-Glucose Index and Intravenous Thrombolysis Outcomes for Acute Ischemic Stroke: A Multicenter Prospective–Cohort Study
Source: Frontiers journal article supplement (doi:10.3389/fneur.2022.737441), 2022-02-14
Supplement: Data_Sheet_1.PDF [file Data_Sheet_1.PDF]

Table S1. Association between Mortality and Symptomatic Intracranial Hemorrhage.

| Models            | Mortality (unadjusted) |                | Mortality (Age-, sex-adjusted) |                |
|-------------------|------------------------|----------------|--------------------------------|----------------|
| Variable          | OR (95% CI)            | <i>p</i> value | OR (95% CI)                    | <i>p</i> value |
| SICH by NINDS     | 5.73 (2.82–11.63)      | < 0.0001       | 5.38 (2.62–11.03)              | < 0.0001       |
| SICH by ECASS II  | 8.44 (3.47–20.53)      | < 0.0001       | 8.28 (3.32–20.64)              | < 0.0001       |
| SICH by SITS-MOST | 17.62 (4.85–64.07)     | < 0.0001       | 16.28 (4.39–60.36)             | < 0.0001       |

CI, confidence interval; NINDS, National Institute of Neurological Disorders and Stroke; OR, odds ratio; SITS-MOST, Safe Implementation of Thrombolysis in Stroke-Monitoring Study; \*Statistically significant at  $p < 0.05$ .

Table S2. Subgroup Analysis between Diabetic and Non-diabetic Patients According to Medical History

| Models                                     |          |                 | Age, sex-adjusted of TyG index |                | Multivariable-adjusted <sup>†</sup> of TyG index |                |
|--------------------------------------------|----------|-----------------|--------------------------------|----------------|--------------------------------------------------|----------------|
| Variable                                   | <i>N</i> | Events (%)      | OR (95% CI)                    | <i>p</i> value | OR (95% CI)                                      | <i>p</i> value |
| Diabetic patients ( <i>N</i> = 316)        |          |                 |                                |                |                                                  |                |
| Unfavorable functional outcomes at 90 days | 280      | 74.7% (209/280) | 1.17 (0.79–1.74)               | 0.4251         | 1.21 (0.76–2.12)                                 | 0.3592         |
| Mortality at 90 days                       | 280      | 11.1% (31/280)  | 1.10 (0.63–1.91)               | 0.7440         | 1.40 (0.72–2.73)                                 | 0.3183         |
| SICH at 24–36 h by NINDS                   | 316      | 5.7% (18/316)   | 1.02 (0.49–2.12)               | 0.9657         | 0.97 (0.45–2.11)                                 | 0.9461         |
| SICH at 24–36 h by ECASS II                | 316      | 3.8% (12/316)   | 1.25 (0.51–2.93)               | 0.6449         | 1.12 (0.44–2.84)                                 | 0.8179         |
| SICH at 24–36 h by SITS-MOST               | 316      | 2.5% (8/316)    | 1.56 (0.52–4.65)               | 0.4256         | 1.36 (0.41–4.53)                                 | 0.6168         |
| Non-diabetic patients ( <i>N</i> = 598)    |          |                 |                                |                |                                                  |                |
| Unfavorable functional outcomes at 90 days | 533      | 65.1% (347/533) | 1.12 (0.82–1.53)               | 0.4791         | 1.15 (0.81–1.64)                                 | 0.4297         |
| Mortality at 90 days                       | 533      | 7.1% (38/533)   | 0.77 (0.43–1.39)               | 0.3887         | 0.80 (0.42–1.51)                                 | 0.4883         |
| SICH at 24–36 h by NINDS                   | 598      | 4.8% (29/598)   | 0.66 (0.34–1.28)               | 0.2205         | 0.87 (0.43–1.75)                                 | 0.6859         |
| SICH at 24–36 h by ECASS II                | 598      | 2.3% (14/598)   | 1.06 (0.43–2.61)               | 0.9017         | 1.12 (0.45–2.76)                                 | 0.8125         |
| SICH at 24–36 h by SITS-MOST               | 598      | 1.0% (4/598)    | 0.38 (0.06–2.57)               | 0.3235         | 0.39 (0.05–2.92)                                 | 0.3572         |

CI, confidence interval; NINDS, National Institute of Neurological Disorders and Stroke; OR, odds ratio; SITS-MOST, Safe Implementation of Thrombolysis in Stroke-Monitoring Study; TyG, Triglyceride-glucose index; UFO, unfavorable functional outcome \*Statistically significant at  $p < 0.05$ .

<sup>†</sup>Multivariable regression was adjusted for age, sex, hypertension, and atrial fibrillation.
